# Supplementary material
Source: PubMed Central journal article supplement (PMC2765093)
Supplement: 0902977106_0902977106SI.pdf [file 0902977106_0902977106SI.pdf]

# Supporting Information

Berriman et al. 10.1073/pnas.0902977106

## SI Text

**Tomographic Volume Analysis.** Segmentation of tomographic volumes was performed by drawing contours manually on sections with the segmentation editor and edge detection facility of Amira (Visage Imaging). The path of the VWF tubules within the WPB was determined by a search of the helical model of the tubule against the masked WPB using a 2D template matching technique. The central slice of the helical model was cross-correlated against each slice of the masked WPB for in plane rotations in the range  $[-60^\circ, 60^\circ]$  with a step of  $0.2^\circ$ , using a normalized cross-correlation function from Matlab with Image Processing Toolbox (MathWorks). The correlation peaks were manually connected using Amira yielding a three dimensional trace of each tubule. The tubule trace was re-sampled using 3D piecewise cubic Hermite interpolation (Matlab) to obtain a regularly dense sampling and smooth path for further calculations. For each point of each tubule, the minimum inter-tubule

distance and minimum tubule-to-membrane mask distance was calculated using a Matlab script.

**Ribosome-Sized Densities.** Ribosome-sized densities were identified in the tomogram in [Movie S2](#) using a template matching technique. Fifty-four unique projections of an 80S ribosome model, emd1093 (1), were cross-correlated against 20 projected sections ( $\pm 10$  in Z) for each Z section of the tomogram using a normalized cross-correlation function from Matlab with Image Processing Toolbox (Mathworks). The correlation peaks were thresholded using Amira (Visage Imaging). Peaks were clustered and centroids determined. Projected density for each candidate ribosome was calculated using 20 Z sections centered on the centroid. The projections that did not contain particles (without a regard for size) were manually removed, resulting in 380 candidate ribosome positions. The sum of these projections was compared with the sum of 100 equiangular projections of the search model.

1. Spahn CM, et al. (2004) Cryo-EM visualization of a viral internal ribosome entry site bound to human ribosomes: the IRES functions as an RNA-based translation factor. *Cell* 118:465–475.





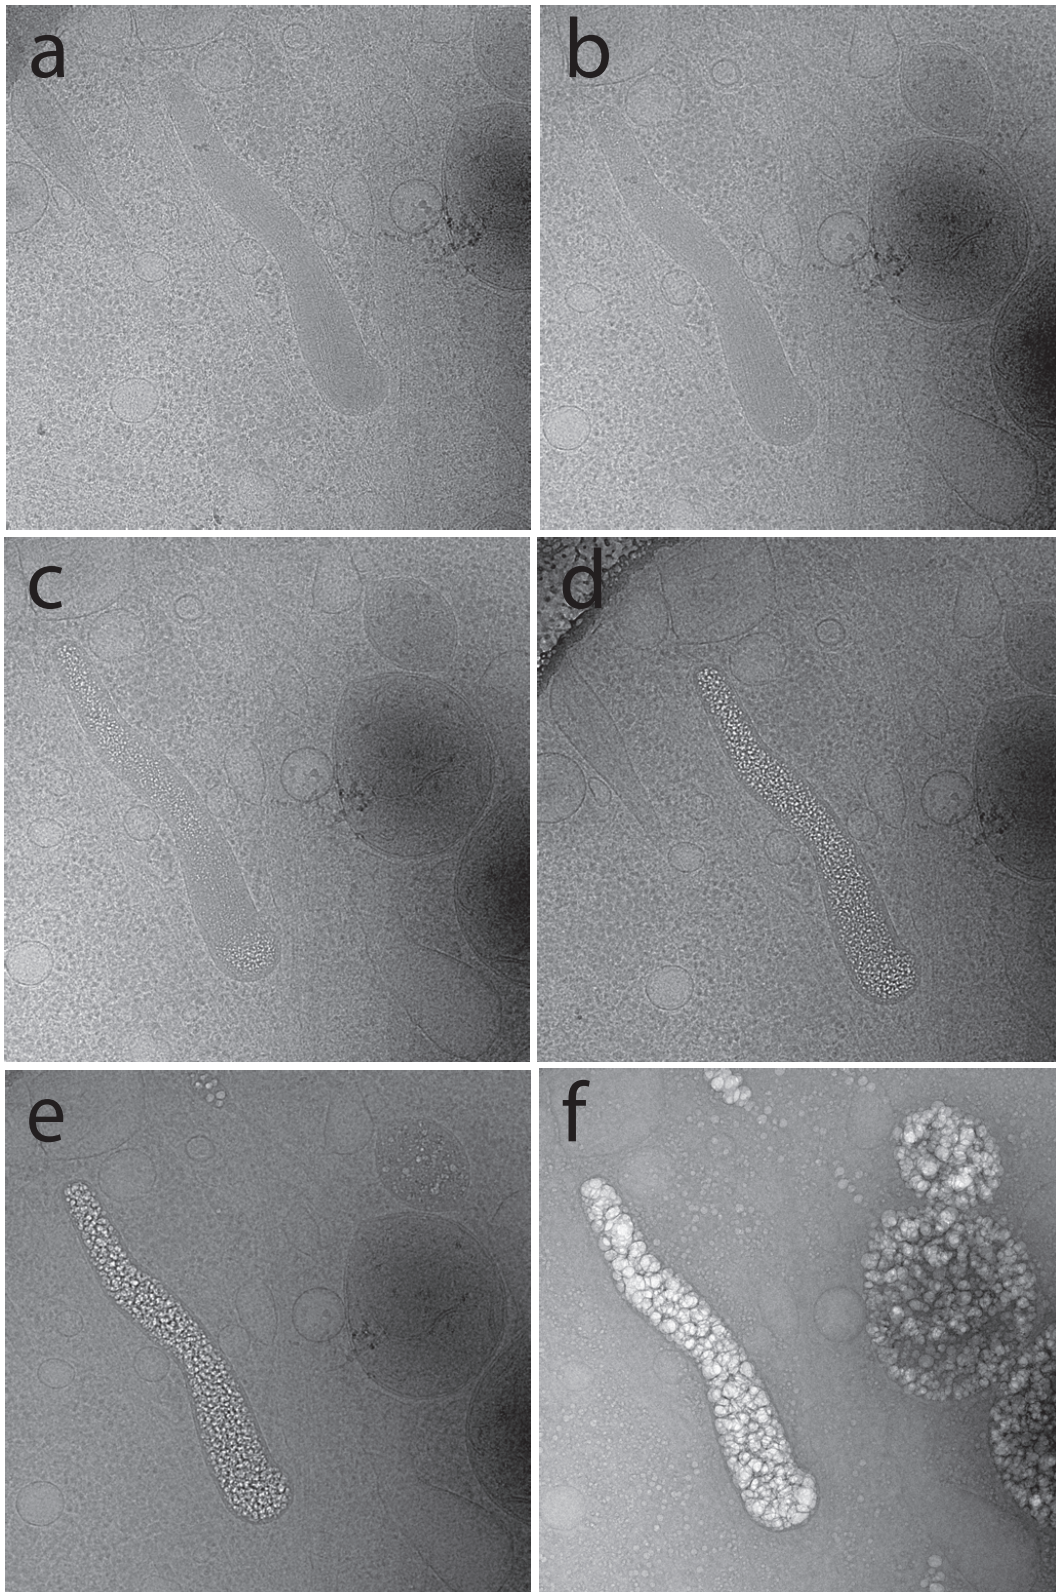

**Fig. S2.** Series of low dose images using 300 keV electrons of the cell periphery of a vitrified endothelial cell at liquid nitrogen temperature shows selective bubbling of the content of a WPB. Accumulated dose for frame (a)  $70 \text{ e}^-/\text{\AA}^2$ , (b)  $85 \text{ e}^-/\text{\AA}^2$ , (c)  $100 \text{ e}^-/\text{\AA}^2$ , (d)  $110 \text{ e}^-/\text{\AA}^2$ , (e)  $140 \text{ e}^-/\text{\AA}^2$ , and (f)  $>250 \text{ e}^-/\text{\AA}^2$ . Bubbling begins in frame (b) for the WPB, but not in the adjacent mitochondria. The small mitochondrion shows bubbling in frame (e). Frame (f) shows bubbling everywhere, including cytoplasm.



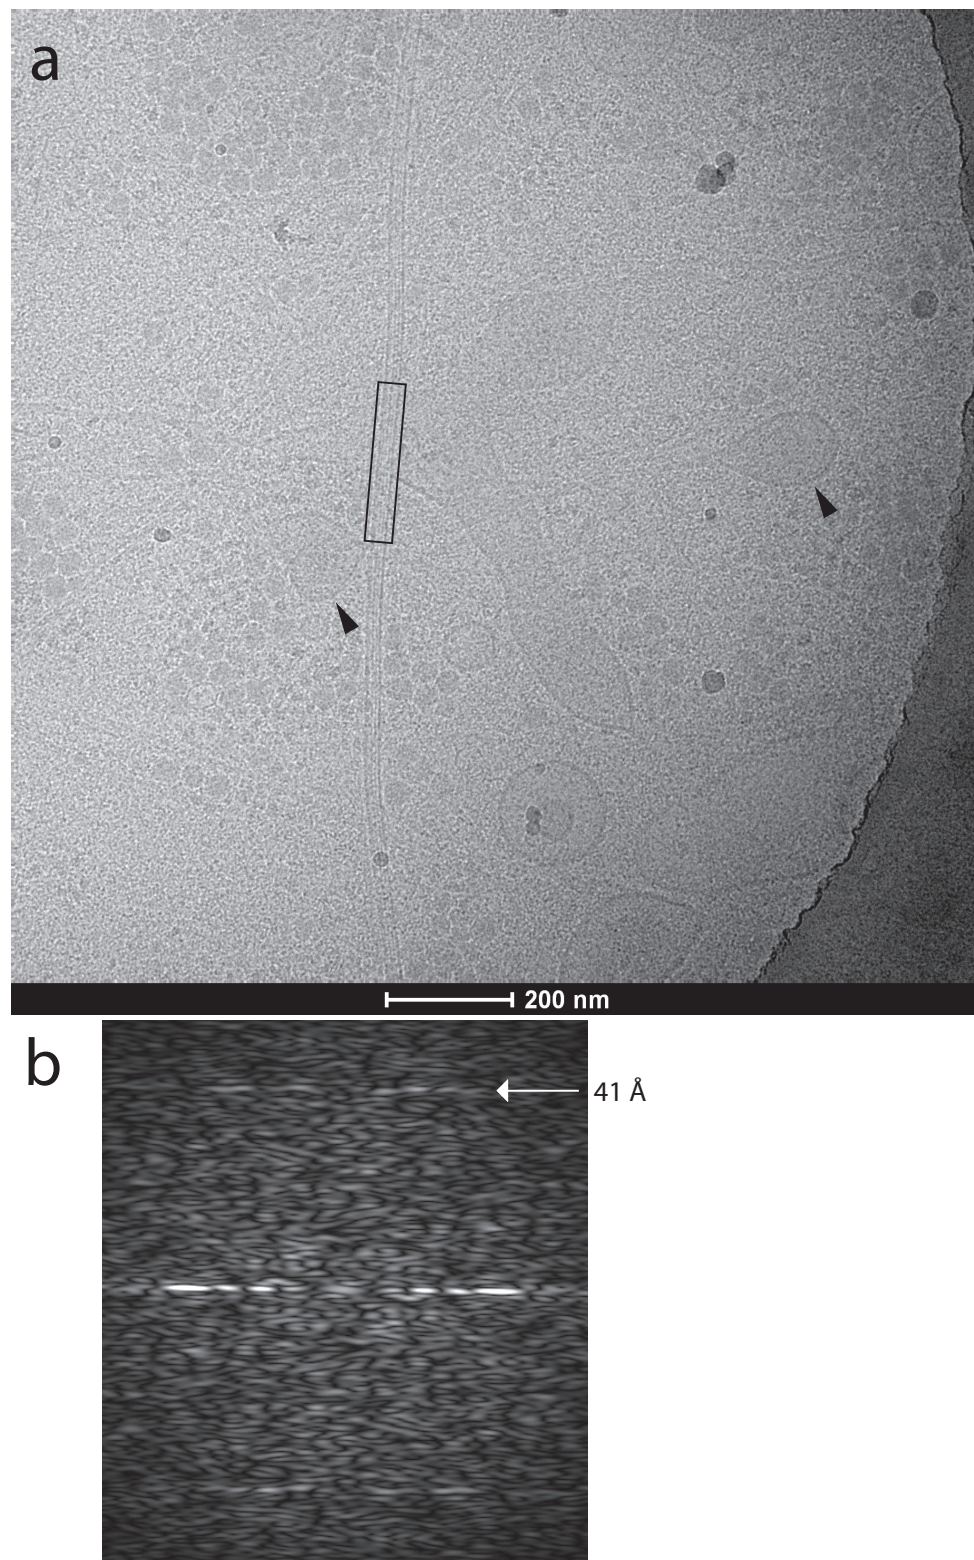

**Fig. S3.** Microtubules and ribosome-sized densities. (a) Microtubule and membranous organelles in a 0.1- $\mu\text{m}$  thick region of a vitrified endothelial cell. A microtubule runs vertically in the image, a segment of which is boxed. A bi-lobed membrane structure is indicated by black arrows at each lobe and should be compared to similar structures in Fig. 2. (b) Fourier transform of the boxed area shows a layer line at 41 Å (arrow) typical for MTs and indicating a good preservation of structure. (c) Location of ribosome-sized densities identified in the electron tomogram in [Movie S2](#) shown with a single slice of the tomogram. Also shown is the sum of projections of 380 ribosome-sized densities (left inset) and sum of 100 projections of the 80S ribosome map (right inset). See [SI Text](#). (d) Low dose image at 120 keV of the same area of the specimen as shown in (c) with Body A, cytoskeletal filaments, and other cell content in projection.



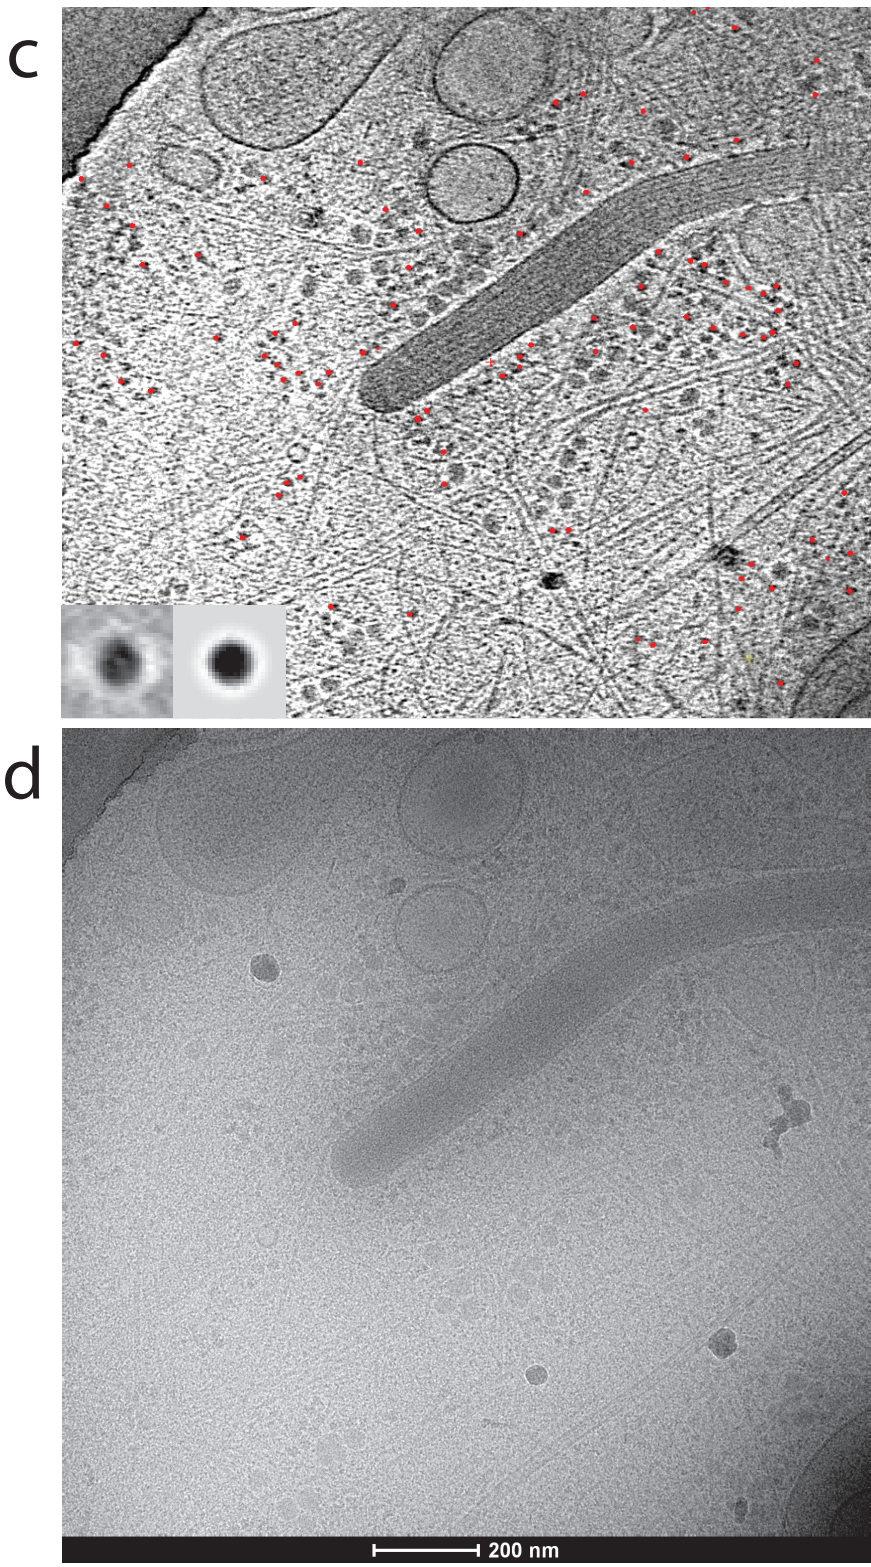

Fig. 53. Continued.











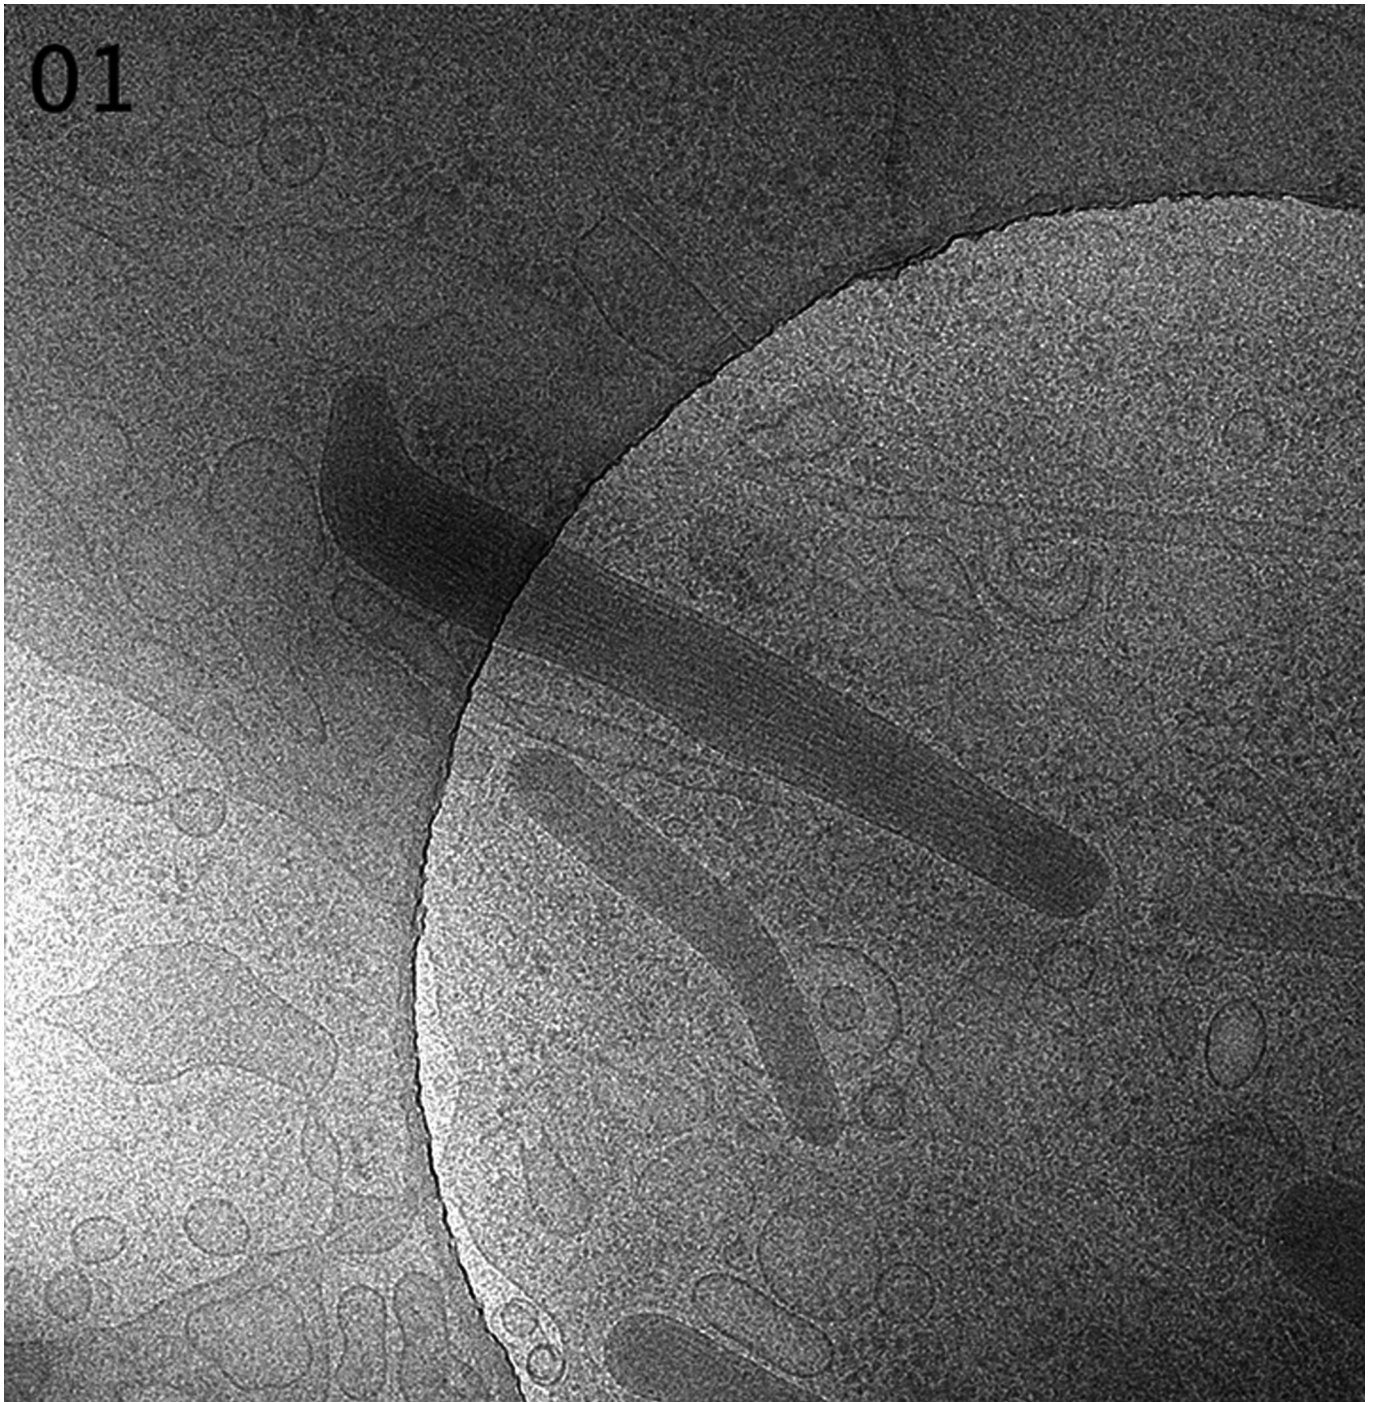

**Movie S1.** EM tilt series recorded at the cell periphery using 120 keV electrons of a vitrified endothelial cell at liquid nitrogen temperature showing WPBs and other organelles including coated vesicles. Each frame is a low dose image of the specimen after rotation of the specimen stage from  $-50^\circ$  (first frame) to  $+35^\circ$  (last frame) in  $5^\circ$  steps. [Note: images were acquired first from  $0$  to  $+35^\circ$  and then from  $-5^\circ$  to  $-50^\circ$ .] Several WPBs show a bubbling of internal contents due to radiation damage from accumulating electron dose (total dose  $>50e^-/\text{\AA}^2$ ).

[Movie S1 \(MOV\)](#)



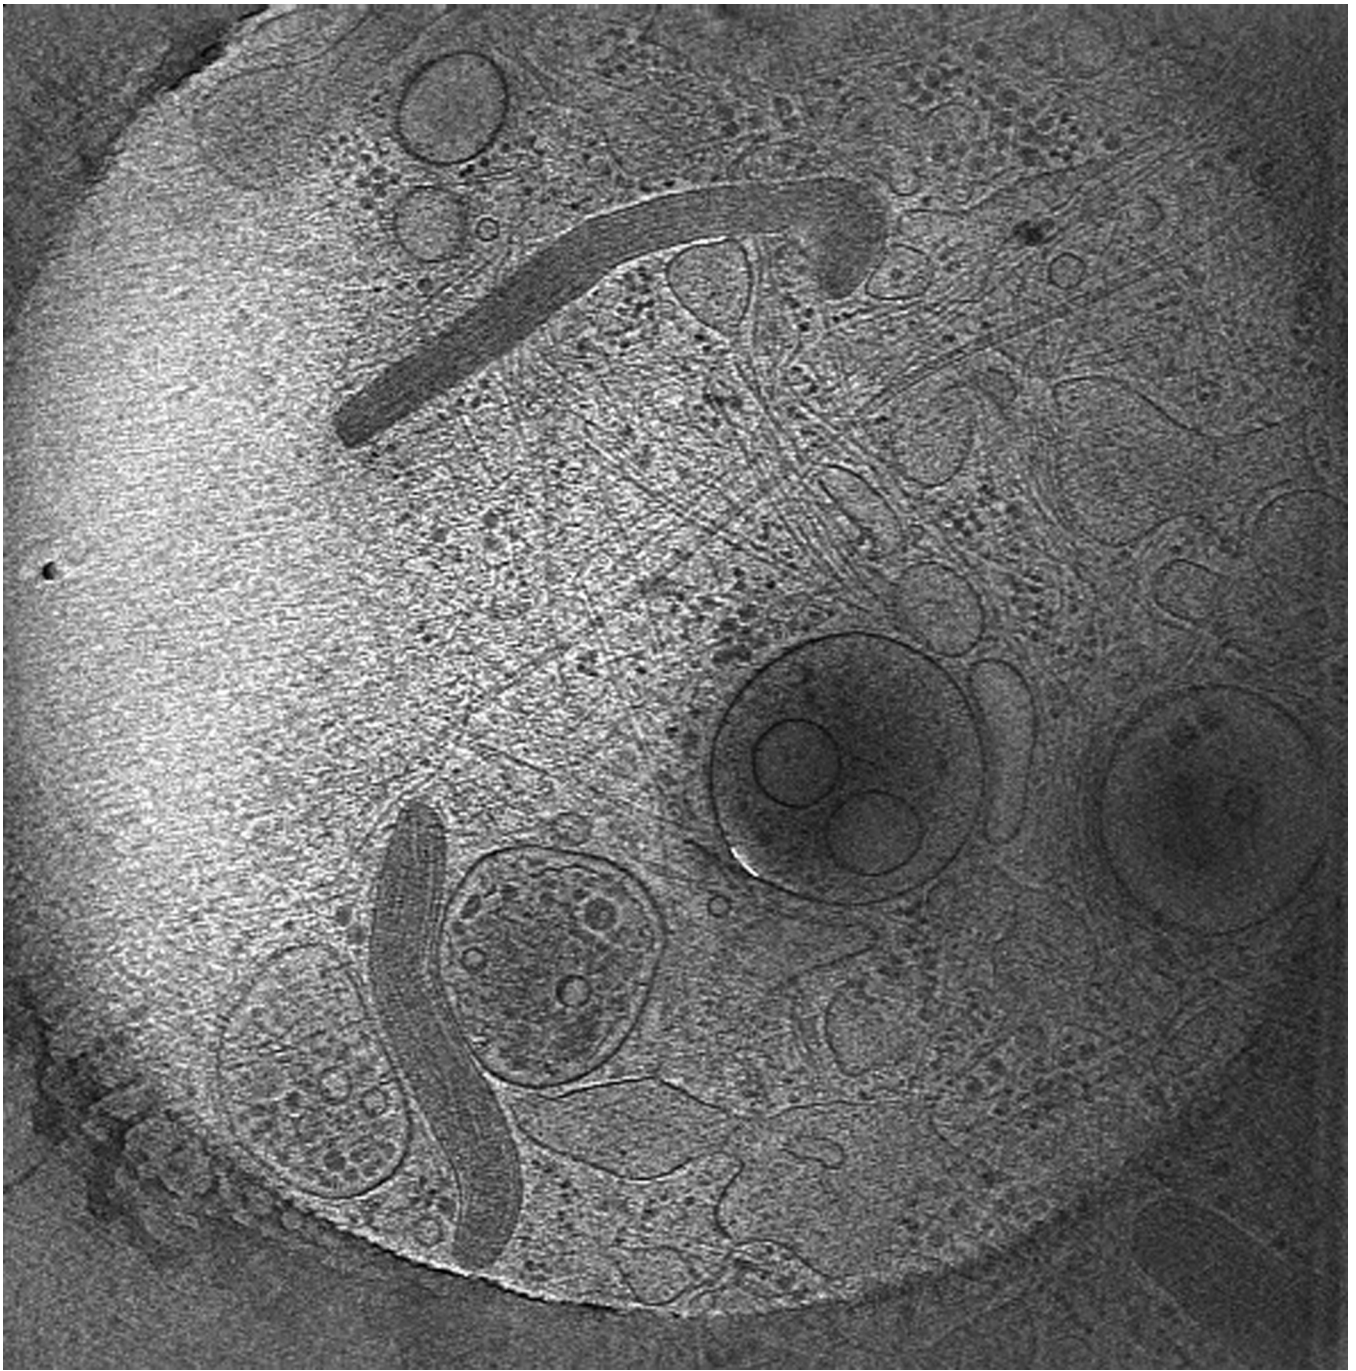

**Movie S2.** Electron tomogram of the endothelial cell periphery with two WPBs. Each frame is a slice through the tomogram. The field of view is annotated in Fig. 2.

[Movie S2 \(MOV\)](#)



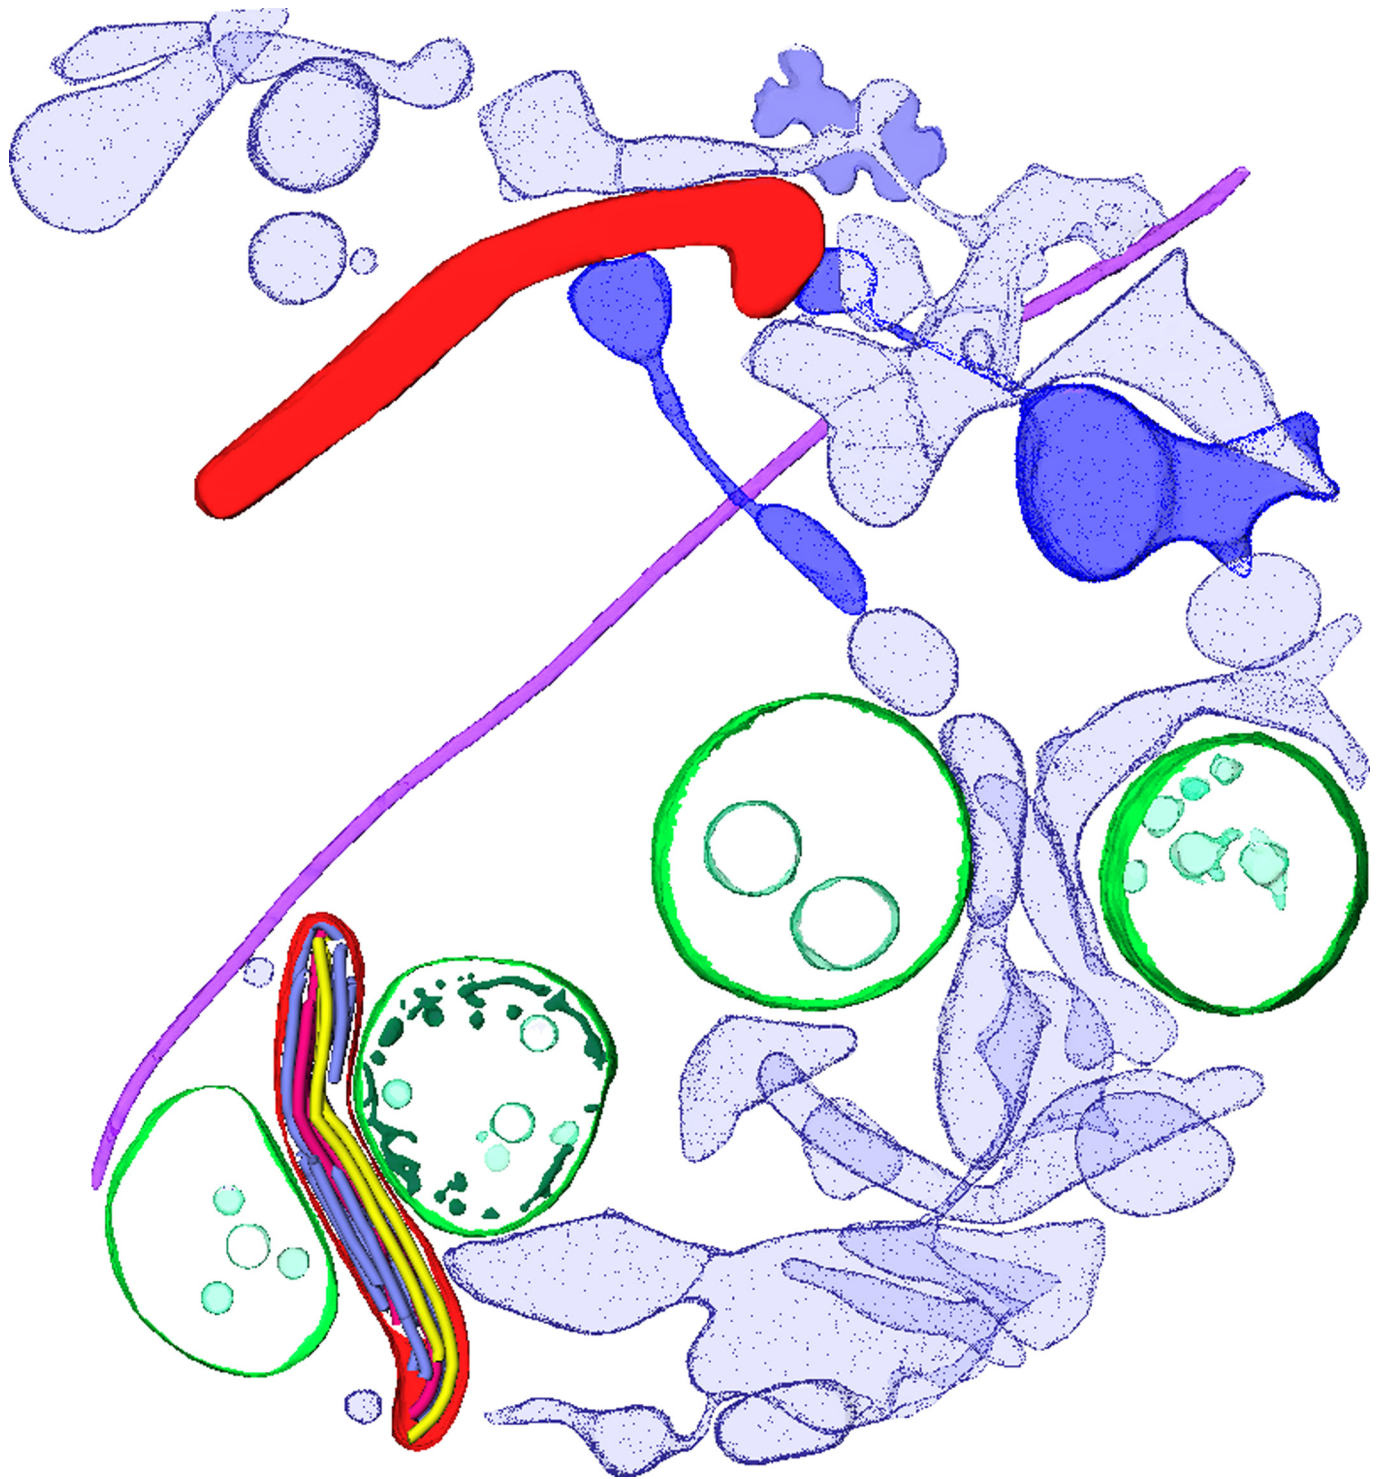

**Movie S3.** Segmentation of the electron tomogram in [Movie S2](#) showing WPBs (red membranes), VWF tubules inside WPB membrane (yellow, blue, and red), multivesicular bodies/late endosome (green membranes), other membranes (blue), microtubule (purple).

[Movie S3 \(MOV\)](#)



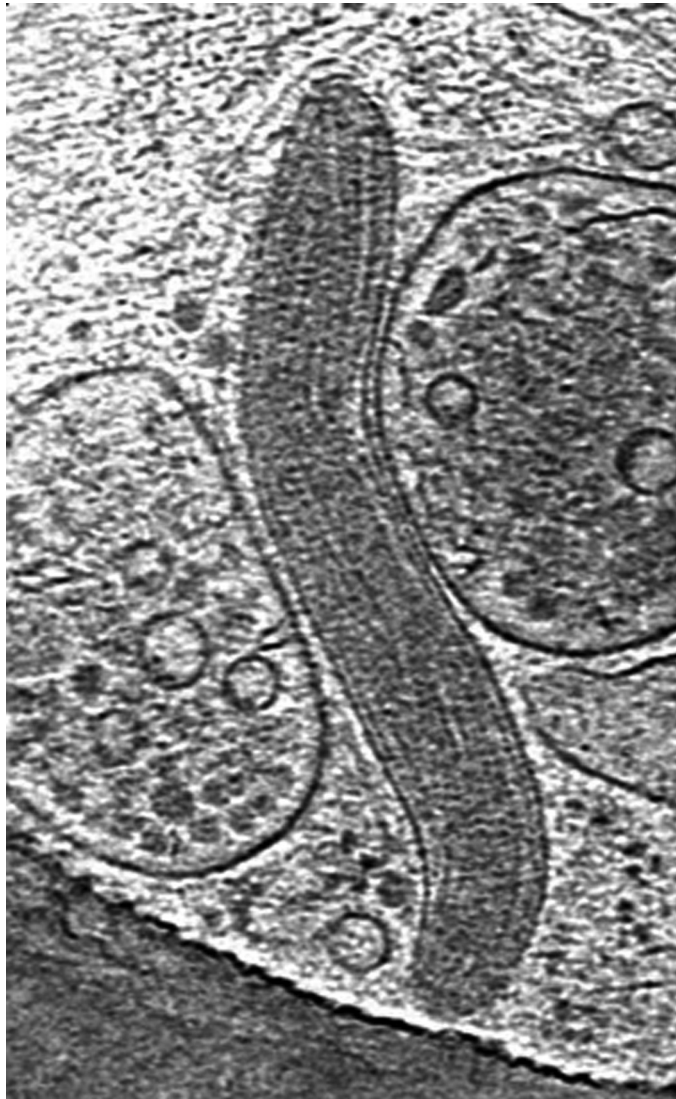

**Movie S4.** Electron tomogram of a WPB. Each frame is a slice through a tomogram which is a subvolume of the tomogram shown in [Movie S2](#). The WPB is between two multivesicular bodies and is labeled body B in Fig. 2. Yellow lines show the trajectory of filaments in the model for the tubules.

[Movie S4 \(MOV\)](#)



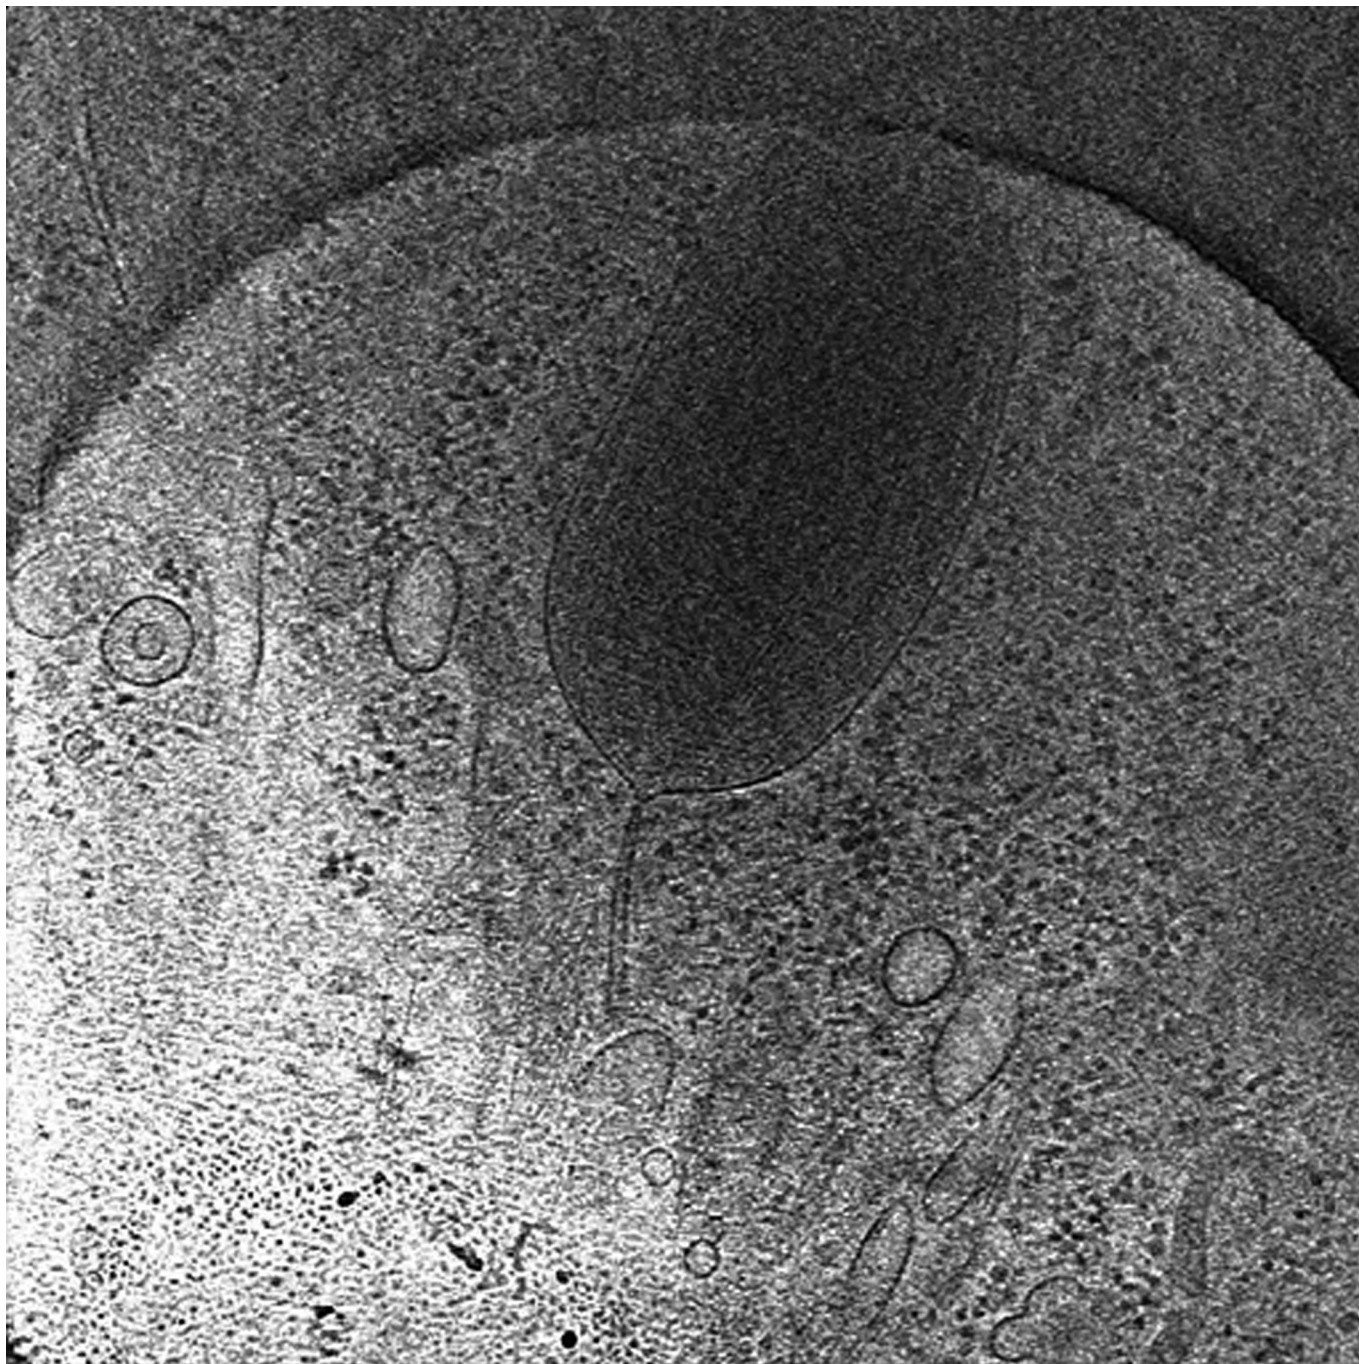

**Movie S5.** Electron tomogram of a marrow-shaped WPB. Each frame is a slice through the tomogram. A section of the tomogram is shown in Fig. 5D.

[Movie S5 \(MOV\)](#)





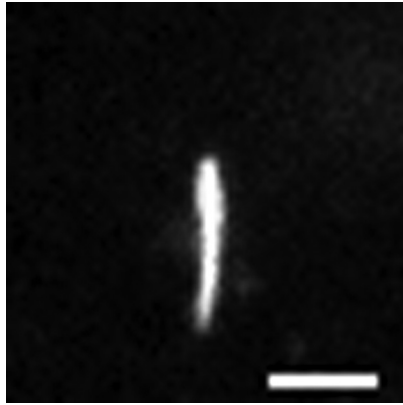

**Movie S7.** Live cell fluorescence image of WPB exocytosis. HUVECs expressing EGFP-CD63 were imaged at 7 frames/s during histamine stimulation. (Scale bar, 1  $\mu\text{m}$ .)

[Movie S7 \(MOV\)](#)
